# Supplementary material for: The dual challenges of urbanization and ecological protection: a new path for optimizing ecological patterns in semi-humid areas
Source: Research Square preprint supplement (doi:10.21203/rs.3.rs-6815667/v1), 2025-11-21
Supplement: Supplementary file 1 [file 556a0a300c79b9b3dca6c2d1.docx]

**Table S1.**  Formulas and Explanations (on the next page)

| **Formula Name** | **Formula** | **Explanation** | **Application** |
| --- | --- | --- | --- |
| Probability of Connectivity (PC) |  | represents the number of patches, and are the areas of patches and , is the total area of the entire landscape, and is the maximum probability of species dispersal between patches and . The value of ranges from 0 to 1, with higher values indicating greater connectivity of the regional ecological landscape. | Used to calculate the landscape connectivity between patches; dPC and dIIC values are computed to assess patch importance. |
| Integral Index of Connectivity (IIC) |  |
| Cost Path Calculation for Ecological Corridors |  | represents the gravitational force between ecological sources i and j , denotes the maximum resistance value among all corridors , represents the cumulative resistance value from source i to source j , and are the areas of ecological sources i and j , and are the resistance values of patches i and j. | Normalization of land use types to create resistance surface values, using Min-Max normalization. |
| Gravity Model for Ecological Corridors |  | 𝑀CR represents the minimum cumulative resistance value from the  starting ecological source to the target source, 𝐷𝑖𝑗 denotes the spatial distance between ecological source 𝑗 and the landscape matrix 𝑖, 𝑅𝑖 represents the resistance coefficient of ecological source 𝑖 in a specific direction, 𝑓𝑚𝑖𝑛 is a positive correlation function indicating the relationship between spatial distance and resistance coefficient/ | Min-Max normalization of continuous data such as elevation, NDVI, and population density. |
| Ecological Network Connectivity Evaluation |  | L represents the number of potential important ecological corridors, and V denotes the number of ecological source areas. | Calculates the cost of species movement between ecological patches, based on spatial distance and resistance. |

**Table S2.** Landscape Types and Their Ecological Significance.

| ***Landscape type*** | **Ecological meaning and function** |  |
| --- | --- | --- |
| Core | Patches with foreground data larger than the specified edge width, which are larger in size and are considered to be major habitats as well as ecological source sites. |  |
| Islet | Island plates are the only disconnected patches among the seven types of foreground data. |  |
| Perforation | The area formed between the foreground data and the background data is the internal boundary of the core area. |  |
| Edge | The outer boundary of the core area, usually the perforation area formed between the foreground data and the background data. |  |
| Bridge | Narrow areas in the foreground data connecting 2 or more core panels with an area smaller than the developed edge width are important for landscape connectivity. |  |
| Loop | The foreground data connected to the core area region, which is a shortcut for species migration. |  |
| Branch | The foreground data that expands from a core area and does not connect to another core area. |  |
